# Supplementary material for: Platelet-Derived Growth Factor Receptor Beta: A Novel Urinary Biomarker for Recurrence of Non-Muscle-Invasive Bladder Cancer
Source: PubMed Central journal article supplement (PMC4011858; doi:10.1371/journal.pone.0096671), 2014-05-06
Supplement: pone.0096671.s001.pdf [file pone.0096671.s001.pdf]

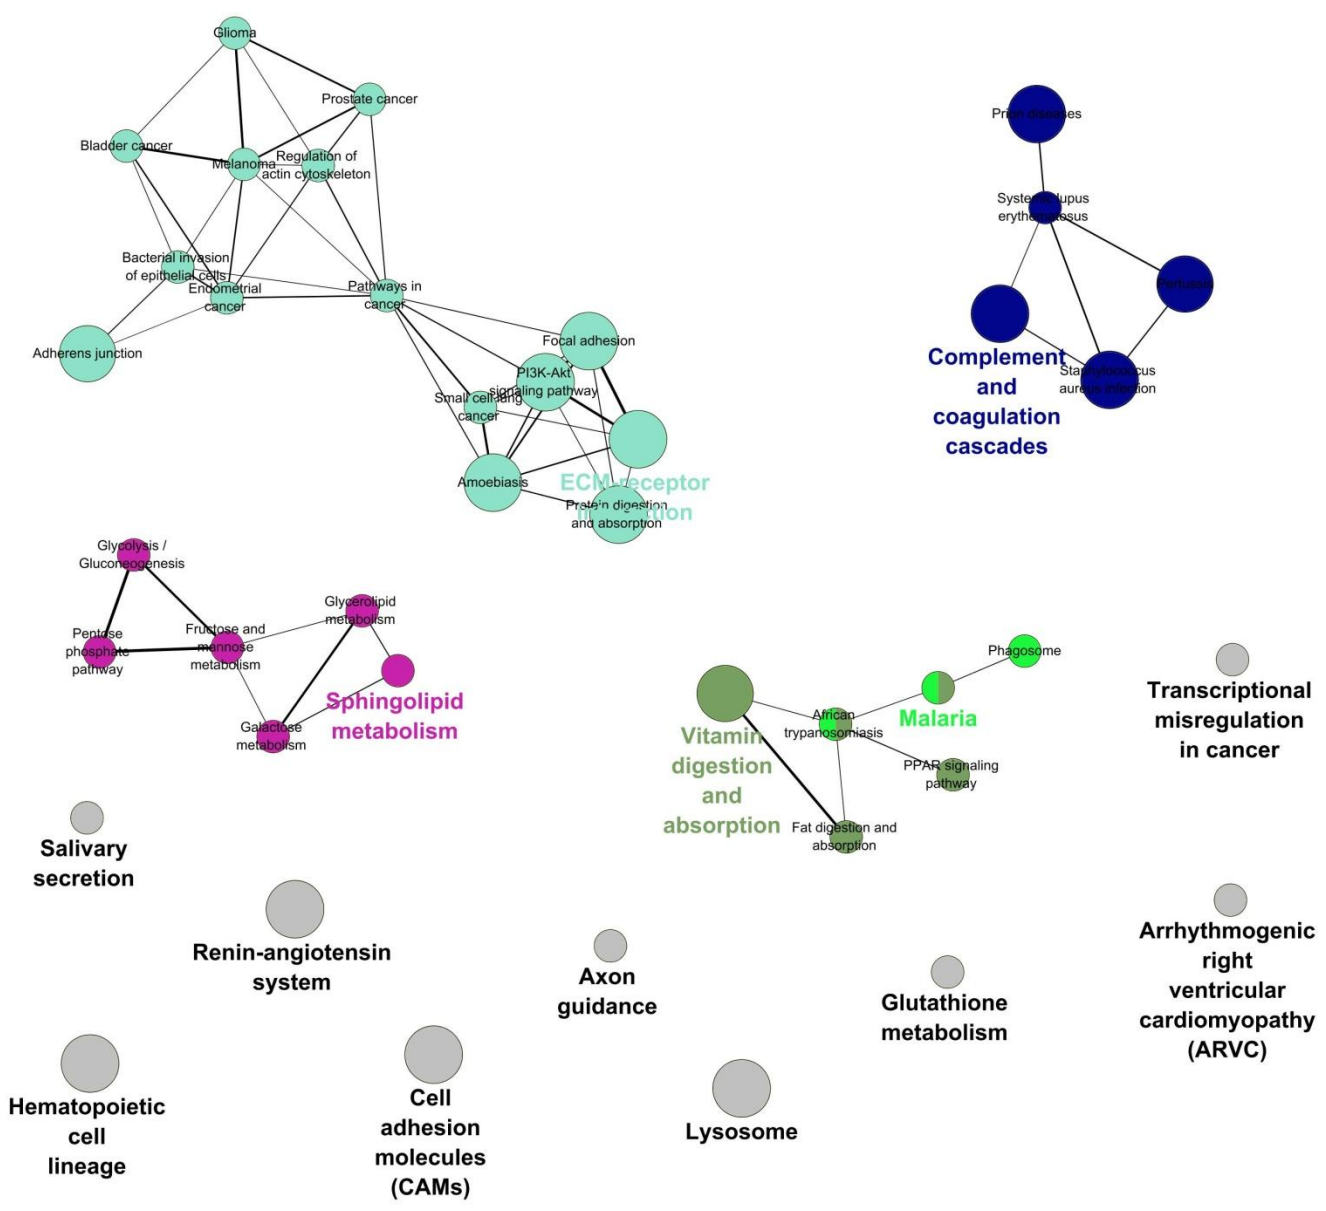

Figure S1

**A.**

Patient 1  
Non-relapse

Patient 2  
Relapse

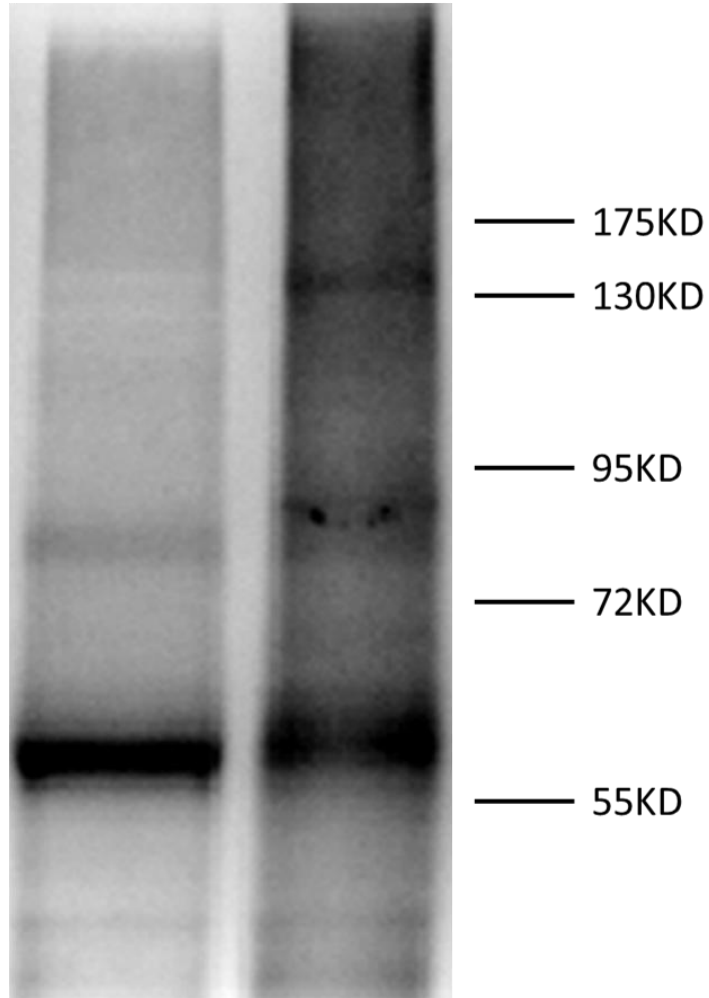

Figure S2

**B.**

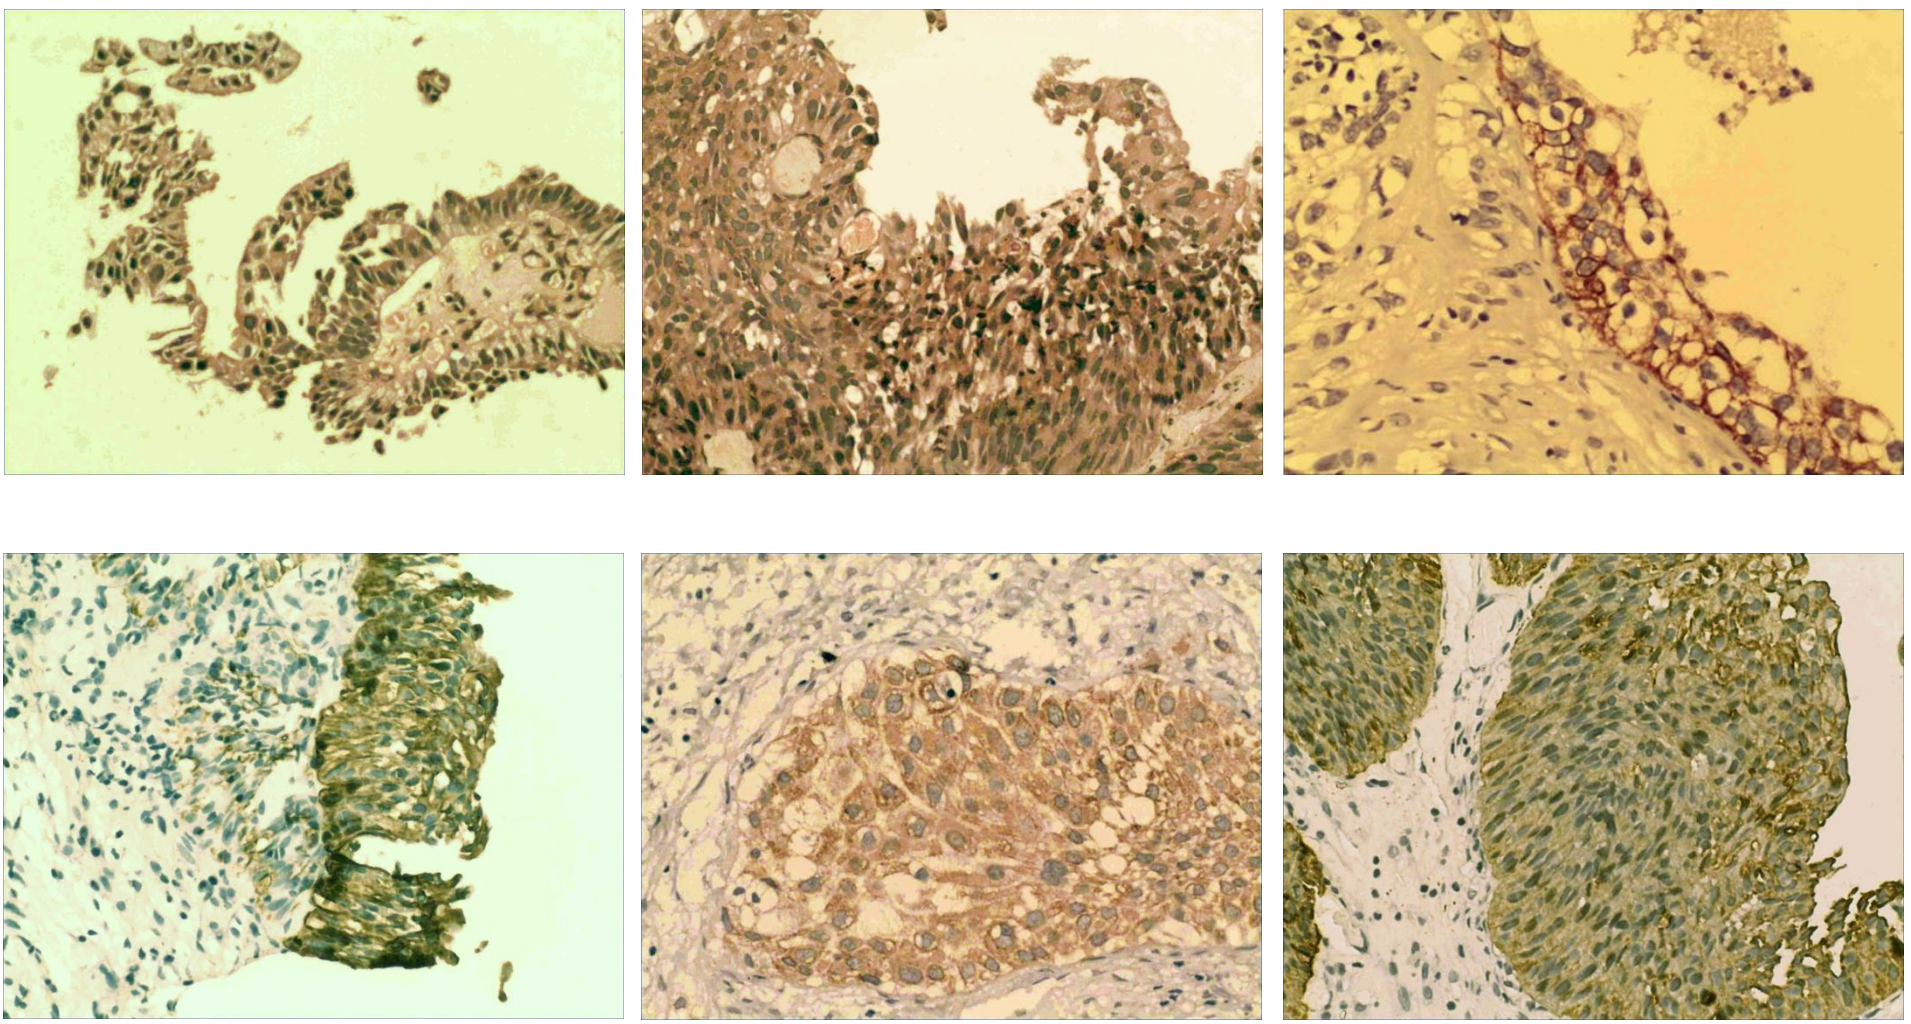

Figure S2



C.

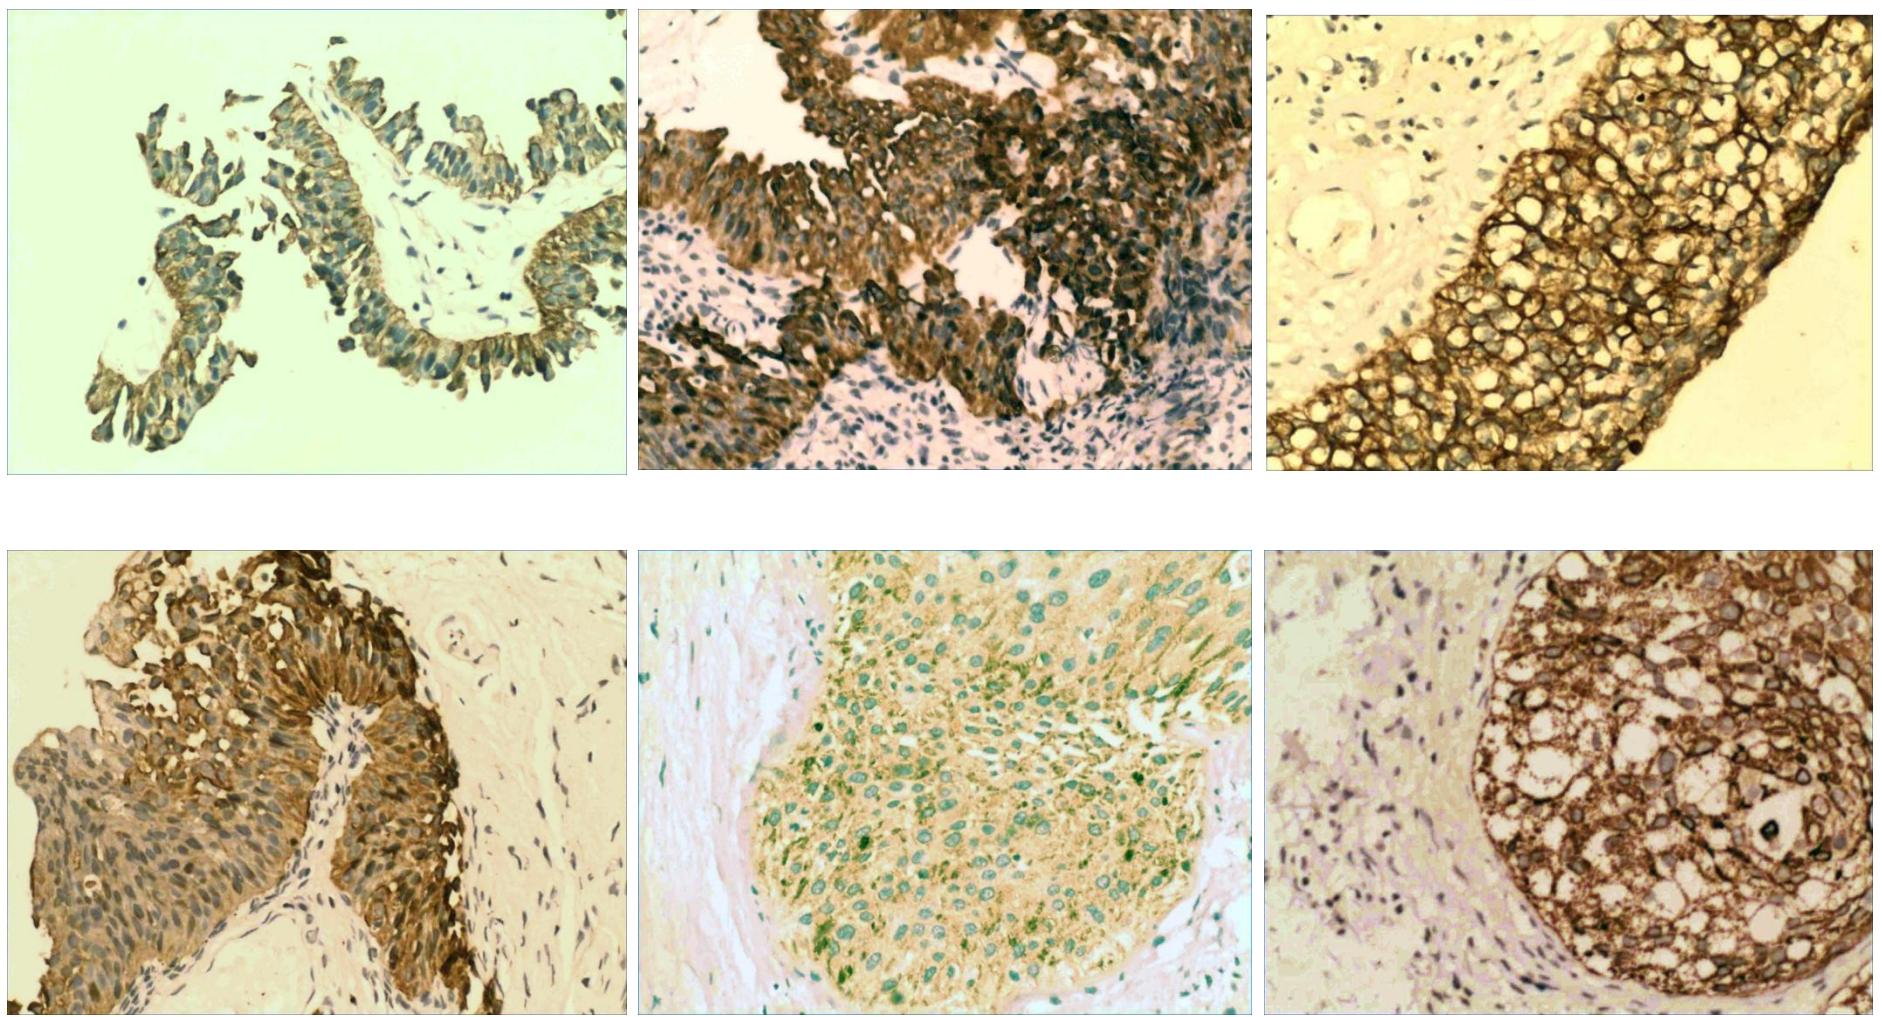

Figure S2

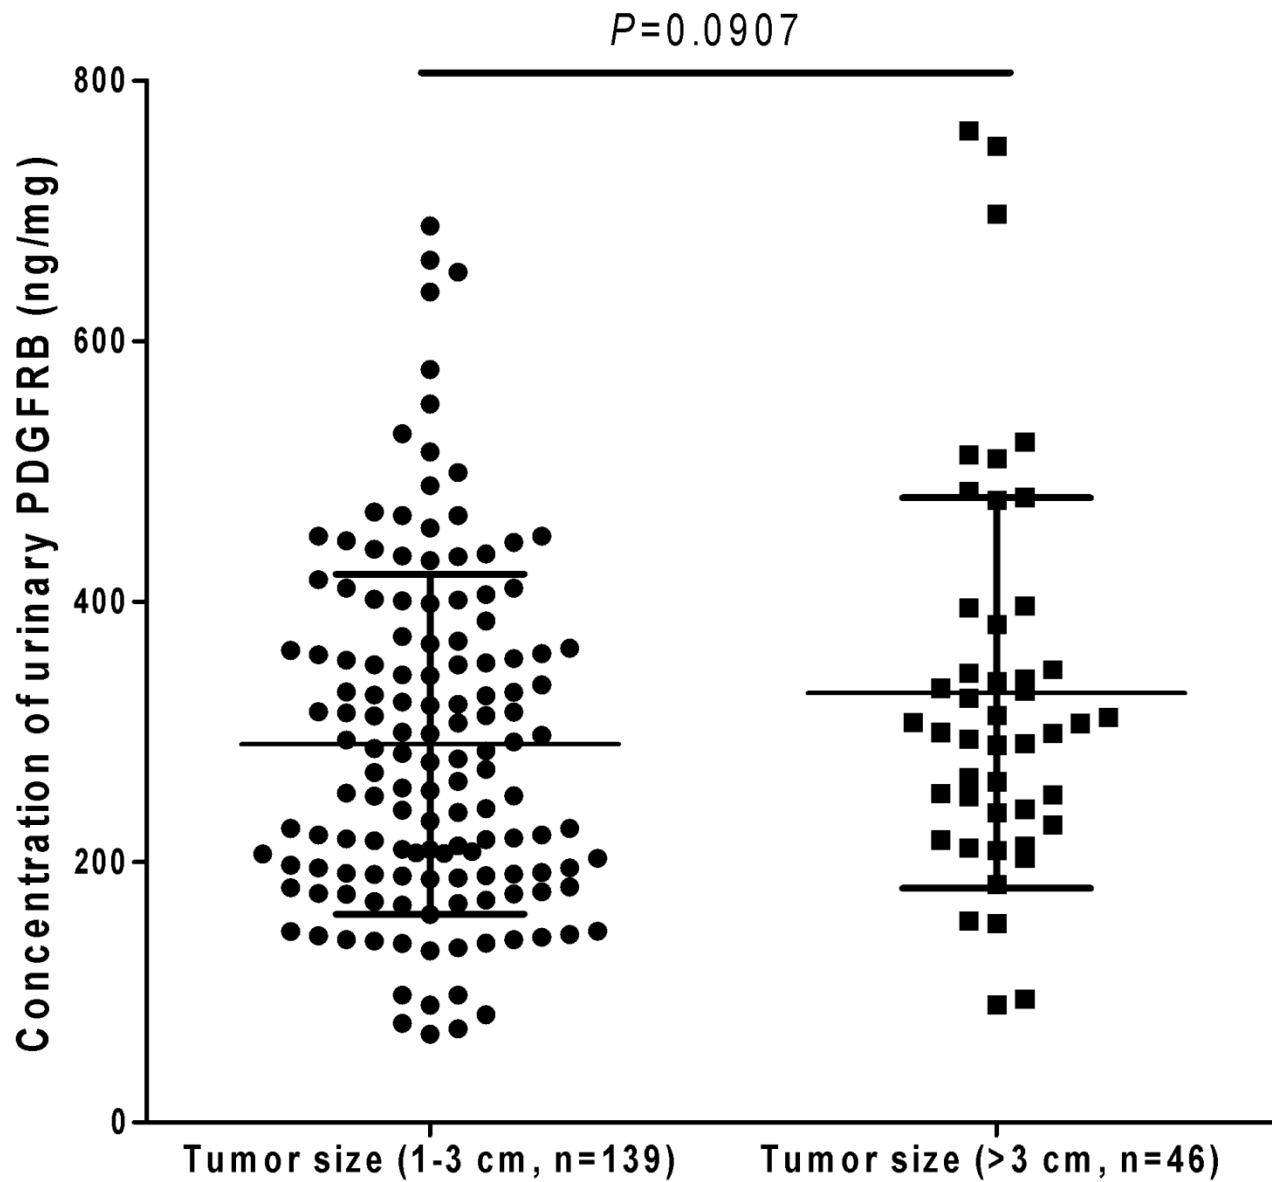

Figure S3
